# Supplementary material for: Taxonomic Organization of the Family Brucellaceae Based on a Phylogenomic Approach
Source: PubMed Central journal article supplement (PMC7002325; doi:10.3389/fmicb.2019.03083), 2020-01-30

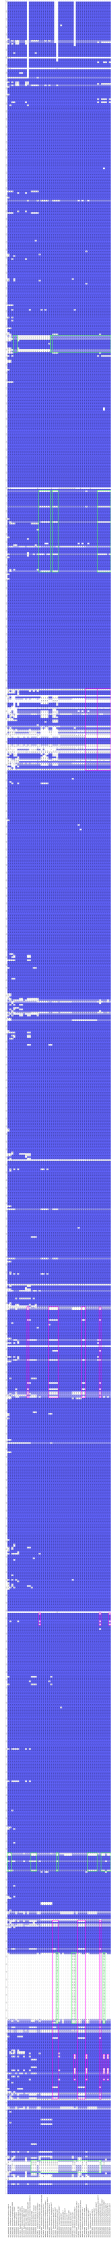

Supplement: Image_1.pdf [file Image_1.pdf]
