# Supplementary material for: Taxonomic Organization of the Family Brucellaceae Based on a Phylogenomic Approach
Source: PubMed Central journal article supplement (PMC7002325; doi:10.3389/fmicb.2019.03083), 2020-01-30
Supplement: Image_3.pdf [file Image_3.pdf]

**F. ovis & F. shanghaiense**

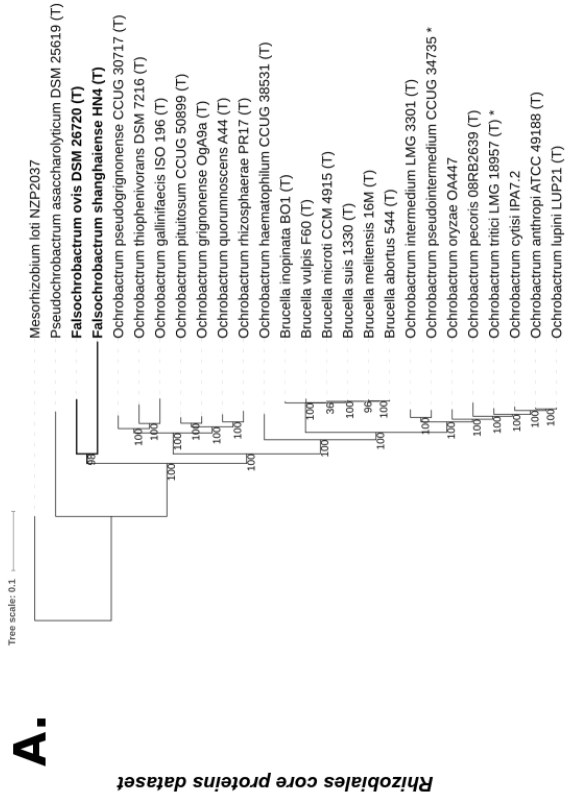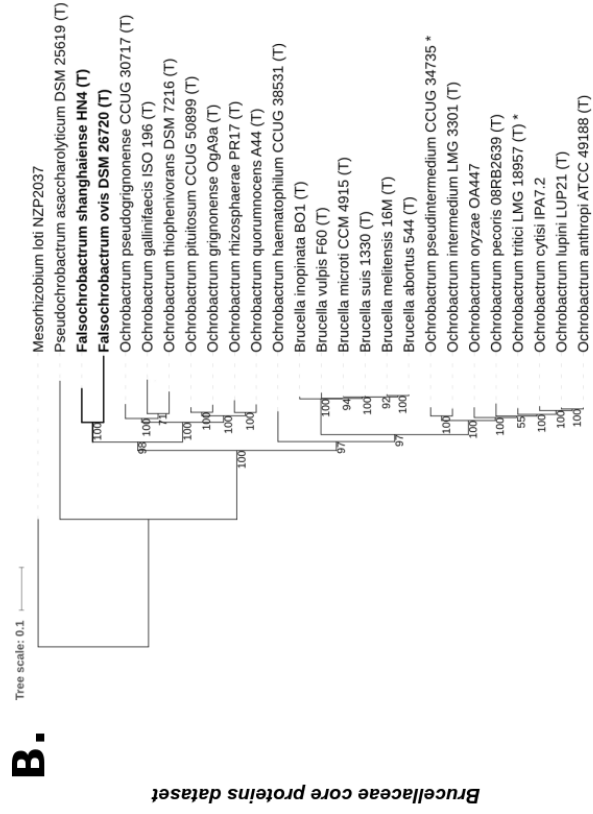

**F. ovis alone**

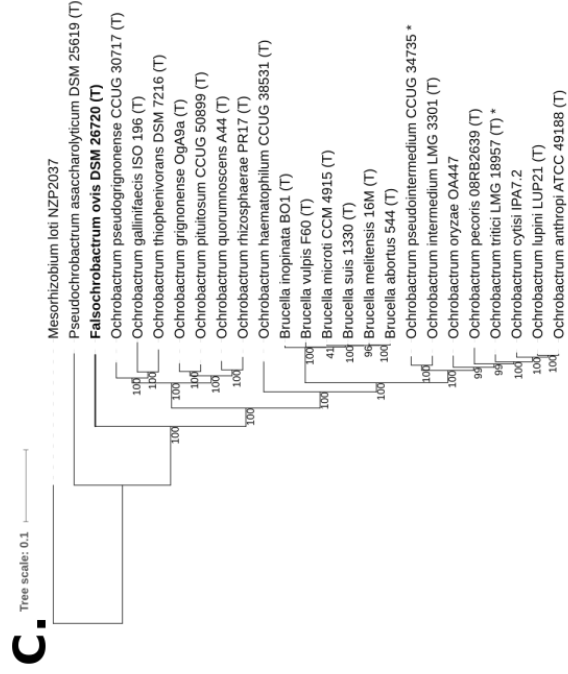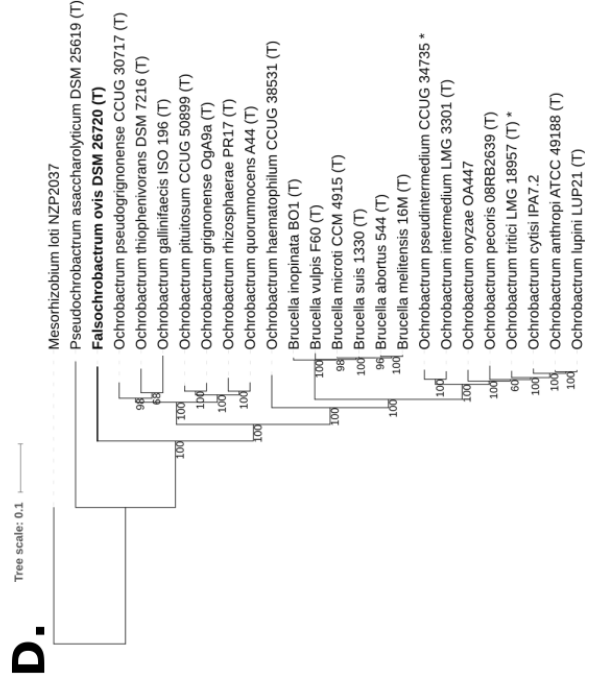

**F. shanghaiense alone**

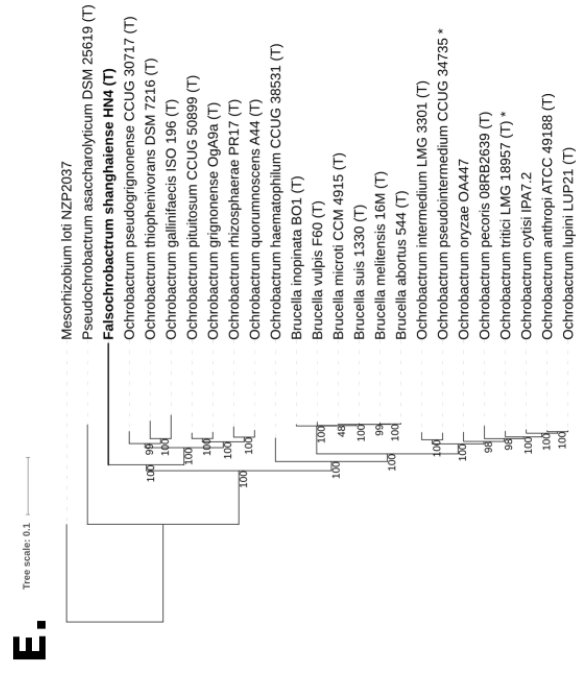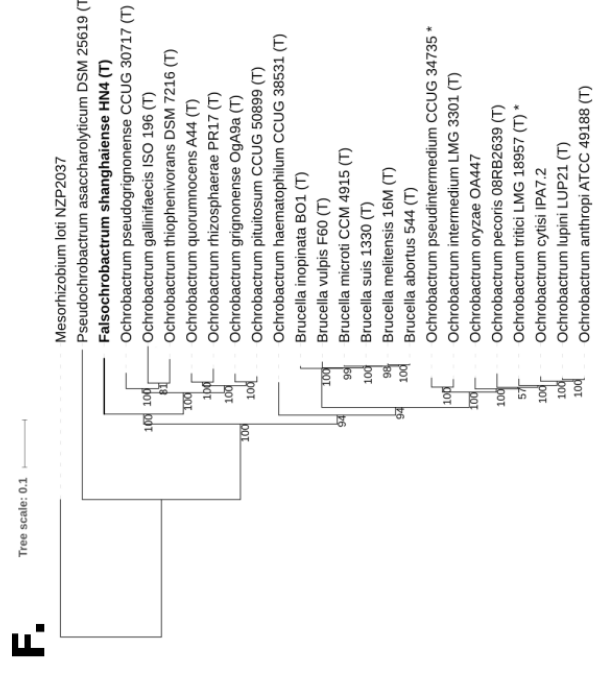

**Figure S3. Position of Falsochrobacterium spp. among the family Brucellaceae.** Various ML phylogenetic trees were computed using RaxML from the alignment of 145 and 195 core proteins (A,C,E and B,D,F, respectively), on datasets including representative *Brucellaceae* and both *Falsochrobacterium* (A,B), *F. ovis* only (C,D), or *F. shanghaiense* only (E,F). All trees were rooted using the *Mesorhizobium loti* genome. Branching support was estimated using 100 bootstrap replicates.
